# Supplementary material for: Barium stable isotopes as a fingerprint of biological cycling in the Amazon River basin
Source: Copernicus journal article supplement (doi:10.5194/bg-17-5989-2020), 2020-12-03
Supplement: Supplementary file 1 [file Supplementary_tables_Charbonnier_et_al_BG_2020.xlsx]

## Sheet: Table S.1
Eluates	Na	Mg	Al	K	Ca	Fe	Sr	Ba	La	Ce	yield
Sediments
AM06_36	0	0	2	0	0	0	0	29	2	5	1.05
AM08_17	0	0	2	0	0	0	0	25	1	3	0.98
AM08_37	0	0	4	0	0	0	2	44	1	2	0.95
AM06_02	0	0.1	3.1	0	0	0	1	16	1	2	1.04
Dissolved loads
AM08_12	0	1	1	0	2	0	0	21	0	0	1.09
AM07_02	0	1	1	0	1	2	0	12	0	0	1.06
AM08_38	0	2	1	0	1	0	0	31	0	0	1.05
AM07_18	0	2	11.32	1	1	5	0	17	0	0	1.03
AM08_05	0	5	1	0	5	1	0	19	0	0	1.04
AM08_22	0	2	1	0	2	0	0	18	0	0	0.99
AM1_10	0	1	1	0	0	4	0	14	0	0	0.98
Residual matrix, Ba concentration, and Ba yield after Ba separation. Concentration data are expressed in µg /L of the solution run on the mass spectrometer.
	Before chemical separation					After chemical separation
	Ba/Na	Ba/K	Ba/Mg	Ba/Ca	Ba/Sr	Ba/Na	Ba/K	BaMg	Ba/Ca	Ba/Sr	yield
SRM3104a spiked with Rw matrix #1	0.002	0.004	0.008	0.002	0.2	3.12993	3.53267	9.41828	10.1302	27.0413	1.07
SRM3104a spiked with Rw matrix #2	0.002	0.008	0.002	0.004	0.2	26.6518	58.3406	25.1654	5.78589	7.05061	1.05
Chemical composition of two solution of standard doped with two different river matrix (Rw#1 and Rw#2), before and after Ba separation. In this test, the chemical separation has been performed one time (instead of two for samples)

## Sheet: Table S.2
Sample	River	Location	W/Da	D (t/km2/yr)a,b	Q (m3/s)	S (km2)	fBadiss eq. (4)			fBabio eq. (8)			fBasec eqs. (6) & (8)			FBasec (kg/km2/yr) eq. (9)			FBabio (kg/km2/yr) eq. (9)			FBadiss (kg/km2/yr) (eq. 10)
							median	25th	75th	median	25th	75th	median	25th	75th	median	25th	75th	median	25th	75th	median	25th	75th
								percentile	percentile		percentile	percentile		percentile	percentile		percentile	percentile		percentile	percentile		percentile	percentile
Solimões tributaries
AM08_05	Amazonas	Tamshiyacu	0.03	578.706	29600	726000	0.066	0.0356904	0.114267	0.308904	0.234026	0.463407	0.431182	0.241063	0.604484	102.029	38.7258	299.545	76.1046	45.3955	173.402	51.77	46.2853	56.877
AM08_13	Ucayali	Jenaro Herrera	0.03	586.932	10740	347990	0.075	0.04058	0.145517	0.274171	0.159293	0.433615	0.448805	0.20815	0.659882	71.5687	22.7314	243.668	45.489	22.2321	107.103	41.9546	37.8507	45.9921
AM08_24	Maranon	Mouth	0.03	913.106	16885	357255	0.046	0.0252646	0.0847661	0.106551	0.012816	0.192123	0.751015	0.606346	0.874839	251.625	133.429	666.194	29.797	4.27831	83.6766	47.3473	43.1989	52.0925
AM08_34	Morona	Mouth			1050	16100	0.4	0.29469	0.611498	0.535201	0.335047	0.777064	-0.106648	-0.568442	0.260652	-6.8354	-29.9158	37.4277	44.9532	24.038	93.7203	42.7188	38.8737	47.1581
AM08_36	Pastaza	Mouth			2770	39000	0.12	0.0875852	0.182447
AM08_38	Huallaga	Mouth	0.04	728.438	2984	68741	0.02	0.00891436	0.0387272	0.0437642	-0.147853	0.174232	0.875953	0.731928	1.07534	749.811	468.409	2107.27	32.5979	-161.954	165.017	71.8671	64.7305	77.929
AM08_40	Tigre	Nueva York			2187	42170	0.02	0.00850621	0.0415061
Madeira tributaries
AM07_05	Beni	Rurrenabaque	0.02	1036	3772	124000	0.07	0.0358587	0.136326	0.188869	-0.0615665	0.433635	0.649857	0.403202	0.928265	106.126	42.417	255.922	25.5484	-11.4158	88.7146	23.3429	21.3477	25.7746
AM07_09	Beni	Riberalta	0.00535507	3157	2014	69943	0.07	0.0372492	0.137614	0.408253	0.170516	0.714677	0.445267	0.143687	0.706636	86.1979	21.2893	209.518	76.4946	27.1268	194.896	24.8808	22.3131	27.2918
AM07_14	Madre de dios	Riberalta	0.0351118	591	5602	140000	0.14	0.077104	0.257525	-0.0170186	-0.38314	0.243816	0.609285	0.30076	1.0742	42.6492	14.0629	139.621	-2.17613	-28.6805	17.114	25.4579	22.8023	27.3876
AM07_15	Mamoré	Guayaramerin	0.05	104	7114	611713	0.1	0.0496113	0.205442	-0.388249	-0.691336	-0.137885	1.02684	0.677094	1.3661	36.0355	14.9359	95.9144	-13.14	-32.4462	-3.50658	12.1335	10.9584	13.3012
AM01_08	Alto Beni	Mouth	0.00769447	3829	840	29900	0.03	0.0174972	0.0558294	0.155295	-0.0555113	0.395832	0.750908	0.501204	0.953915	144.325	66.6273	256.825	28.5611	-9.08809	80.7749	16.3122	14.856	17.8847
AM01_10	Chepete	Mouth					0.06	0.0341272	0.112765	-0.293211	-0.534112	-0.100218	1.00909	0.761	1.30283
AM01_12	Quiquibey	Mouth					0.23	0.127727	0.429756	0.31	0.12	0.52	0.414	0.11	0.64
AM1_17	Orthon	Mouth	0.15	64	460	32300	0.33	0.221773	0.593774	0.0253797	-0.159952	0.198113	0.38814	-0.136153	0.779193	12.433	-2.52304	53.8917	0.754508	-5.54028	5.70727	18.3412	16.6331	20.0983
"Dilute" tributaries
AM6/1-20	Tapajos	Mouth	0.48	20.9805	12000	598000	0.73	0.456388	1.3145	0.341772	0.181954	0.577873	-0.877516	-1.72659	0.106107	-6.74397	-10.4489	1.59702	3.1966	1.99411	5.34156	12.8019	11.3561	13.9005
AM6/1-13	Trombetas	Mouth	0.5	12.1	6200	250000	0.5	0.31235	0.915969	0.565191	0.396695	0.922185	-0.557318	-1.3418	-0.0327221	-9.28424	-14.551	0.955053	10.3228	6.37111	20.471	15.5791	14.1353	17.1353
AM06_20	Negro	Paricatuba	0.290741	19.5878	28400	832000	1.63	1.04896	2.78323	0.0691728	-0.152454	0.457868	-1.33622	-3.13862	-0.0999945	-4.40013	-6.40452	-0.610843	0.275945	-0.784359	1.05479	7.4788	6.74828	8.28367
Main tributaries
AM05_04	Solimões	Manacapuru	0.1	207.323	103800	2242000	0.41	0.182931	0.856603	0.431155	0.204086	0.877758	0.03	-0.197069	0.476603	2.26264	-22.1866	60.8987	35.9131	18.6193	66.9729	44.781	39.5928	48.1718
AM06_35	Madeira	Foz Madeira	0.05	193.889	17620	975379	0.21	0.112287	0.397791	0.357	0.259287	0.544791	0.05	-0.0477131	0.237791	1	-6	22	9	5	18	14.1439	12.8435	15.5126
AM06_63	Amazonas	Obidos	0.12	245.192	177000	5088000	0.28	0.163321	0.53486	0.277392	0.160713	0.532253	0.159419	0.0427403	0.41428	8.18268	-8.7216	53.7456	13.2401	7.15559	31.8135	28.9856	26.2533	31.7899
aDellinger, M., Gaillardet, J., Bouchez, J., Calmels, D., Louvat, P., Dosseto, A., Gorge, C., Alanoca, L., and Maurice, L. (2015b). Riverine liisotope fractionation in the amazon river basin controlled by the weathering regimes.Geochimica et Cosmochimica Acta, 164:71–93.
bWittmann, H., Von Blanckenburg, F., Maurice, L., Guyot, J.-L., Filizola, N., and Kubik, P. W. (2011). Sediment production and delivery inthe Amazon River basin quantified by in situ–produced cosmogenic nuclides and recent river loads.Bulletin, 123(5-6):934–950.

## Sheet: Table S.3
River reach (indexed by downstream station)	Measured Ba flux downstream from the river reach	Upstream Ba flux calculated as the sum of the dissolved Ba fluxes from the various tributaries contributing to the river reach	Difference between measured and predicted flux
Maranon San Regis	11392	11187	205
Amazonas	38160	27882	10278
Beni at Riberalta	3096	2933	163
Madeira Porto Velho	19991	14935	5056
Madeira Foz Madeira	27338	19991	7347
Amazonas Obidos	122355	116874	5480
Details on calculations are given in Supporting text.

## Sheet: Table S.4
Catchment	GPP (t/km2/yr)	TER (t/km2/yr)	NPP (t/km2/yr)	MAP (mm/yr)	MAT (T°C)
Solimões tributaries
Amazonas	2352	1784	568	1749.02	20.1121
Ucayali	2198	1791	407	1587.74	18.7553
Maranon	2488	1767	721	1984.94	21.348
Morona
Pastaza
Huallaga	2510	2029	481	1592.88	21.0824
Tigre
Madeira tributaries
Beni@rure	2028	1583	445	1291.73	17.12
Beni@ribé	2196	1755	441	1481	21
Madre de dios	2794	2200	594	2383.43	22.4122
Mamoré	2278	1798	480	1573.7	25.2177
Alto Béni	1620	1289	331	1141.73	14.6738
Chepete
Quiquibey
Orthon
"Dilute" tributaries
Trombetas	3089	2398	691	2189.44	26.0418
Tapajos	2468	2018	450	2078.02	25.3382
Negro	2855	2038	817	2534.08	26.0418
Main tributaries
Solimões	2763	2076	687	2317.17	23.7851
Madeira	2469	1981	488	1837.63	24.7111
Amazonas Obidos	2716	2072	644	2230.78	26.7028
GPP stands Gross Primary Production,TER for Terrestrial Ecosystem Respiration, NPP for Net Primary Productivity, MAP for Mean Average Precipitation and MAT for Mean Annual Temperature. Data from:
Jung, M., Koirala, S., Weber, U., Ichii, K., Gans, F., Camps-Valls, G., Papale, D., Schwalm, C., Tramontana, G., and Reichstein, M. (2019).The FLUXCOM ensemble of global land-atmosphere energy fluxes.Scientific data, 6(1):74
Tramontana, G., Jung, M., Camps-Valls, G., Ichii, K., Ráduly, B., Reichstein, M., Schwalm, C. R., Arain, M. A., Cescatti, A., Kiely, G., et al.(2016). Predicting carbon dioxide and energy fluxes across global fluxnet sites with regression algorithms.Biogeosciences Discussions.
https://www.worldclim.org

## Sheet: Table S.5
Sample	River	Baa	Tha	[spm]	TOC	average
		(ppm)	(ppm)	(mg/L)	(%)	Ba/Th
Solimões Tributaries
AM08_01	Amazonas	471.5	7.264	2529.44	0.23	50.92
AM08_02	Amazonas	527	10.39	925.13	0.51
AM08_03	Amazonas	531.9	11.01	457.173	0.73
AM08_04	Amazonas	536.8	10.62	496.657	0.84
AM08_05	Amazonas	548.1	13.76	343.944	0.94
AM08_07	Amazonas	494.1	8.3	1434.3	0.54
AM08_08	Amazonas	523.8	10.36	922.465	0.87
AM08_09	Amazonas	538.7	10.91	699.063	0.89
AM08_10	Ucayali	569.2	12.96	640.834	0.81	47
AM08_12	Ucayali	587.5	13.39	599.428	0.94
AM08_13	Ucayali	593.5	14.15	490.193	0.89
AM08_14	Ucayali	508	5.473		0.08
AM08_16	Ucayali	541.6	8.91	2738.14	0.53
AM08_17	Ucayali	542.4	9.039	2065.07	0.42
AM08_18	Ucayali	540.5	10.76	132.671	0.62
AM08_20	Maranon	493.2	8.064	830.909	0.59	52
AM08_21	Maranon	544.8	11.18	332.167	1.23
AM08_22	Maranon	537.6	10.2	517.5	0.85
AM08_23	Maranon	522.7	11.34	466.005	0.91
AM08_24	Maranon	559.4	13.36	177.14	1.28
AM08_25	Maranon	475.5	8.484	1245.19	1.39
AM08_26	Maranon	514.3	9.636	1098.14	1.59
AM08_27	Maranon	501.7	8.988	1277.11	1.16
AM08_30	Maranon	378.6	9.217	1717.54	1.02
AM08_31	Maranon	412.8	10.87	1250.68	1.41
AM08_32	Maranon	425.4	11.49	1323.6	1.01
AM08_33	Maranon	422.2	12.96	844.702	1.62
AM08_34	Morona	474	13.77	173.593	1.59	34.4227
AM08_36	Pastaza	708.6	8.72	101.639	1.89	81.2615
AM08_38	Huallaga	563.6	15.25	334.571	1.65	36.9574
Madeira Tributaries
AM07_01	Beni	372.1	10.62	666.448	0.81	34.56
AM07_02	Beni	540.1	15.71	236.145	0.69
AM07_03	Beni	568.8	16.64	222.364	0.71
AM07_04	Beni	581.5	17.16	109.42	0.74
AM07_06	Beni	423.4	13.63	2550.9	0.41	30.24
AM07_07	Beni	406.8	14.24	3373.11	0.39
AM07_08	Beni	463.6	14.77	2212.53	0.49
AM07_09	Beni	494.2	15.29	1003.31	0.93
AM07_11	Madre de Dios	496.1	11.95	2134.65	0.73	40.3
AM07_12	Madre de Dios	575.5	14.84	678.554	0.74
AM07_13	Madre de Dios	611.5	15.42	591.831	0.72
AM07_14	Madre de Dios	624.3	15.31	437.16	0.73
AM07_16	Mamoré	315	7.934	631.239	0.5	49.64
AM07_17	Mamoré	316	9.088	716.986	0.33
AM07_18	Mamoré	401.4	11.05	371.231	0.62
AM1_08	Alto Beni	514.929	16.4488	1758		31.2
"Dilute" tributaries
AM 06/1_20	Trombetas	278	14	32		19.8571
AM 06/1_13	Tapajos	568	14.7	109		38.6395
AM06_20	Rio Negro	312	11.7	4		26.6667
Main tributaries
AM05_01	Solimões	561.7	13	95.6622	1.19	42.24
AM05_02	Solimões	575.4	13.39	92.2941	1.54
AM05_03	Solimões	563.1	13.51	76.3824	1.62
AM05_04	Solimões	496	9.922	282.5	1.02
AM05_05	Solimões	508.5	10.38	197.431	1.01
AM05_06	Solimões	559.6	12.96	136.493	1.19
AM05_07	Solimões	556.2	12.42	139.657	1.27
AM05_08	Solimões	547	12.28	135.11	1.22
AM05_15	Madeira	636.3	17.16	94.2535	1.1	39.06
AM05_16	Madeira	624.3	17.01	85.4714
AM05_17	Madeira	641.7	17.82	74.0143	1.27
AM05_18	Madeira	673.8	18.93	61.1408	1.47
AM05_19	Madeira	668.5	18.83	49.1127	1.39
AM05_21	Madeira	663.1	18.13	100.729	1.11
AM05_22	Madeira	642.9	17.47	87.7083	1.09
AM06_55	Amazonas	458.2	10.39	341.333	0.6	42
AM06_56	Amazonas	549.8	13.24	192.667	1.04
AM06_57	Amazonas	547.9	13.57	198.347	1.07
AM06_58	Amazonas	541	13.5	124.133	1.11
AM06_59	Amazonas	595.5	14.98	101.125	1.2
AM06_60	Amazonas	530.4	13.19	482.453	0.9
AM06_61	Amazonas	566.8	14.29	158.827	1.08
AM06_62	Amazonas	603.5	15.8	84.425	1.22
AM06_63	Amazonas	532.8	13.42	249.547	0.76
AM06_64	Amazonas	552.7	14.6	140.933
AM06_65	Amazonas	599.4	15.76	80.9873	1.23
aBouchez, J., Gaillardet, J., France-Lanord, C., Maurice, L., and Dutra-Maia, P. (2011). Grain size control of river suspended sediment geochemistry: Clues from amazon river depth profiles.Geochemistry, Geophysics, Geosystems, 12(3).

## Sheet: Table S.6
Sample	River		D (gauging)a	D (cosmogenic nuclides)b	Proportion of shalesc	(Ba/Th)0	(Ba/Th)n (eq. C4)	wBa (flux from gauging) (eq. 3)	wBa (flux from cosmogenic nuclide) (eq. 3)	wBa (iso) (eq. 12)	16th	84th	(Li/Al)nd	wLi (flux from gauging)d (eq. S3)	wLi (flux from cosmogenic nuclide)d (eq. S3)	wLi (iso) eq. (S4)d	16th	84th	FBamiss (from sediment gauging) (eq. 14)	± sd	FBamiss (from cosmogenic nuclides) (eq. 14)	± sd	Missing ECorg fluxes (eq. 15)	Measured ECorg (eq. 16)	[Ba]org from NPP (eq. 17)
			(t/km2/yr)	(t/km2/yr)							percentile	percentile					percentile	percentile	(kg/km2/yr)		(kg/km2/yr)		(t/km2/yr)	(t/km2/yr)	mg/kg
Solimões tributaries
AM08_05	Amazonas		578.706	288.786	0.7	76	0.67	0.16	0.277										60	57.0164	30	57.0164	5954	3	0.669935
AM08_13	Ucayali		586.932	505	0.7	76	0.62	0.14	0.157	0.27	0.08	0.4	0.92	0.14	0.16	0.1	0.08	0.13	87	106.784	75	92.4197	8712	3	0.558833
AM08_24	Maranon		913.106		0.7	76	0.69	0.09											123	164.639			12336	9	0.206636
AM08_34	Morona
AM08_36	Pastaza
AM08_38	Huallaga		728.438		0.8	66	0.56	0.13											137	134.121			13650		0.338856
AM08_40	Tigre
Madeira tributaries
AM07_05	Beni at Rurrenabaque		3156.91	999	1	48	0.72	0.02	0.05	0.3	-0.64	1.32	0.94	0.04	0.11	0.05	0	0.09	500	565.64	158	179.343	50038	20	0.28706
AM07_09	Beni at Riberalta		1035.55	694.286	1	48	0.63	0.06	0.085	0.39	0.14	0.6	0.91	0.06	0.08	0.02	-0.02	0.05	192	186.144	129	125.236	19220	5	0.867286
AM07_14	Madre de dios		590.742	372	0.82	65	0.62	0.09	0.133				0.92	0.04	0.07				103	106.362			10320	3
AM07_15	Mamoré		103.837	305	0.82	65	0.56	0.28	0.108	-0.23	-2.83867	2.34421
AM01_08	Alto Beni		3829	1215	1	48	0.65	0.01	0.032				0.932	0.04	0.12	0.05	0.01	0.1	775	686.266	246	217.883	77508		0.431437
AM1_10	Chepete				1
AM1_12	Quiquibey				1
AM1_17	Orthon		63.7519	88	0.73	73	0.68	0.34	0.264				0.83	0.23	0.17	0.27	0.23	0.32
"Dilute" tributaries
AM6/1-20	Tapajos		20.9805	43	0	51	0.76	0.75	0.478				0.42	0.45	0.21	0.32	0.26	0.38							0.0355178
AM6/1-13	Trombetas		12.1		0	51	0.39	0.87					0.58	0.62		0.43	0.35	0.53							0.0746944
AM06_20	Negro		19.5878	21	0	51	0.53	0.66	0.633				0.49	0.34	0.31	0.41	0.25	0.75							0.00168877
Main tributaries
AM05_04	Solimões		207.323	142.731	0.8	66	0.64	0.3	0.405	0.1	-0.3	0.37	0.69	0.1	0.15	0.18	0.14	0.22	7	41.8724	5	32.083	718	2	0.261376
AM06_35	Madeira		193.889	111	0.85	62	0.63	0.14	0.246	0.33	-0.14	0.67	0.98	0.06	0.1	0.05	0.02	0.08	27	35.1729	15	20.6663	2670	2	0.0922131
AM05_39	Amazonas Obidos		245.192	132.07	0.76	70	0.6	0.16	0.279	0.07	-0.33	0.3	0.92	0.08	0.15	0.1	0.02	0.17	34	44.9231	19	25.5254	3446	3	0.102796
Uncertainties were propagated using gaussian error propagation. We attributed to wBafluxes an uncertainty of 20% and to (Ba/Th)0 an uncertainty of 30%. Uncertainties on the parameters calculated in eqs. 15 and 16 were not calculated as the difference between these parameters is of several orders of magnitude.
aDellinger, M., Gaillardet, J., Bouchez, J., Calmels, D., Louvat, P., Dosseto, A., Gorge, C., Alanoca, L., and Maurice, L. (2015b). Riverine Li isotope fractionation in the Amazon River basin controlled by the weathering regimes. Geochimica et Cosmochimica Acta, 164:71–93.
bWittmann, H., Von Blanckenburg, F., Maurice, L., Guyot, J.-L., Filizola, N., and Kubik, P. W. (2011). Sediment production and delivery inthe Amazon River basin quantified by in situ–produced cosmogenic nuclides and recent river loads.Bulletin, 123(5-6):934–950.
cDellinger, M., Bouchez, J., Gaillardet, J., Faure, L., and Moureau, J. (2017). Tracing weathering regimes using the lithium isotope composition of detrital sediments.Geology, 45(5):411–414.
dDellinger, M., Bouchez, J., Gaillardet, J., and Faure, L. (2015a). Testing the steady state assumption for the earth’s surface denudation using Li isotopes in the Amazon Basin. Procedia Earth and Planetary Science, 13:162–168.

## Sheet: Table S.7
	Concentration in plant tissue (ppm)								molar ratio
	Ba	Ca	Mg	K	SiO2	Na	Sr		Ca/Ba	Mg/Ba	K/Ba
Li, Y. H. (2000).A compendium of geochemistry: from solar nebula to the human brain. Princeton University Press.
Kale choux	4.9	41000	1600	24400	250	2370	96		28725.1	1845.23	17488.4
Oyster SRM 1566	5.2	1400	1300	9300	1100	4950	10		924.269	1412.76	6281.11
Spinach 1570	14.9	13300	8650	25600	2900	14200	80		3064.36	3280.63	6034.08
citrus leaves SRM1572	23.5	31300	5600	18300	1900	160	98		4572.46	1346.63	2734.89
Tomato leaves SRM 1573	57	28300	6850	444400	3000	470	42		1704.45	679.115	27381.4
Pine needle SRM 1575	7.2	4200	1220	3670	814	60	5		2002.58	957.535	1790.15
Bullen, T. and Chadwick, O. (2016). Ca, Sr and Ba stable isotopes reveal the fate of soil nutrients along a tropical climosequence in hawaii.Chemical Geology, 422:25–45.
Roots	5.4	1710					10.1		1087.12
stem	5.1	2540					5.1		1709.77
foliage	2.5	2940					4.2		4037.21
Bullen, T. and Bailey, S. W. (2005). Identifying calcium sources at an acid deposition-impacted spruce forest: a strontium isotope, alkaline earth element multi-tracer approach.Biogeochemistry, 74(1):63–99.
Trees 8-1
1850	9.9	963	105.9	319			3.8		333.937	60.4489	113.165
1860	8.6	893	96.3	295			3.4		356.473	63.2784	120.47
1870	7.2	822	88.6	281			3.2		391.934	69.539	137.066
1880	6	773	79.7	276			2.9		442.285	75.0645	161.553
1890	5.2	763	77.2	287			2.7		503.727	83.896	193.837
1900	4.9	766	76.4	257			2.6		536.669	88.1099	184.202
1910	4.7	756	75	236			2.6		552.202	90.176	176.348
1920	4.1	716	71.7	268			2.4		599.519	98.8241	229.566
1930	4	704	73.7	220			2.3		604.208	104.12	193.161
1940	4.1	722	79	217			2.2		604.543	108.886	185.88
1950	4.2	834	89.1	211			1.9		681.696	119.883	176.437
1960	4.4	819	89.5	238			1.8		639.006	114.947	189.968
1970	3.3	651	80.9	296			1.5		677.237	138.536	315.018
1980	3.1	521	84.2	389			1.5		576.965	153.489	440.702
1990	3.3	467	90.5	509			1.5		485.822	154.975	541.703
bark	72.3	17825	721.1	1576			21.3		846.379	56.3618	76.5552
Tree 10-1
1850	16.2	1090	139.7	277			6.3		230.986	48.7314	60.0512
1860	14.8	996	119.7	260			5.8		231.032	45.7046	61.6977
1870	13	922	110.6	252			5.3		243.479	48.0772	68.0792
1880	11.6	870	103.1	249			5		257.475	50.226	75.3873
1890	10.7	860	984	247			4.9		275.923	519.683	81.0719
1900	9.3	745	87.8	230			4.4		275.009	53.3506	86.8564
1910	8.5	705	79.3	227			4.2		284.737	52.7208	93.7916
1920	7.7	673	77.3	240			4		300.053	56.7305	109.466
1930	8.1	682	85.1	252			4		289.05	59.3707	109.263
1940	7.4	707	98.8	256			4.1		327.991	75.4489	121.497
1950	7.1	771	114.9	265			4.2		372.795	91.4512	131.082
1960	7.3	665	111.2	253			4.3		312.732	86.0814	121.718
1970	6.3	551	85.1	346			3.7		300.251	76.3337	192.882
1980	7.1	482	75.6	597			3.9		233.057	60.1715	295.307
1990	8.8	616	106.9	736			4.1		240.31	68.6472	293.733
bark	156.3	15774	108.4	259			49.5		346.463	3.9192	5.81966
Tree 10-2
1910	18.1	1005	122.1	276			5.2		190.617	38.121	53.5535
1920	17.4	998	117.5	281			5.2		196.904	38.1607	56.7171
1930	14.7	936	115.6	253			4.6		218.591	44.4394	60.445
1940	12.3	837	109.8	251			3.9		233.611	50.4458	71.6681
1950	9.8	771	99.8	201			3.9		270.086	57.5482	72.0323
1960	9.2	736	100.6	262			3.2		274.64	61.7928	100.016
1970	7	588	79.6	328			2.4		288.372	64.2603	164.563
1980	7.5	627	79.5	404			2.4		286.999	59.9009	189.181
1990	6	615	83.4	590			2		351.882	78.5493	345.349
Inner bark	79.3	13192	481.5	3512			22.9		571.099	34.3124	155.539
outer bark	55.3	4797	114.5	378			11.7		297.796	11.7006	24.0062
Composite 10-A
1870	13.5	947	118	197			4.8		240.819	49.3942	51.2495
1880	11.8	884	99.8	186			4.3		257.184	47.7943	55.359
1890	11.6	984	1004	189			4.5		291.213	489.106	57.2217
1900	9.8	809	96	182			4		283.398	55.357	65.2232
1910	8.8	771	90.7	184			3.9		300.778	58.2441	73.4332
1920	8.1	718	82.4	175			3.7		304.308	57.487	75.877
1930	7.1	703	84.3	180			3.7		339.915	67.096	89.0371
1940	6.6	657	79.3	177			3.5		341.74	67.898	94.186
1950	6.1	638	75.9	178			3.3		359.058	70.3136	102.482
1960	5.7	630	86.8	234			3.2		379.437	86.0543	144.178
1970	5.3	604	91.9	419			3.1		391.232	97.9867	277.648
1980	4.1	486	81.9	367			2.8		406.936	112.883	314.369
Composite 10-AB
1870	12	821	82.3	139			4		234.874	38.7566	40.6809
1880	10.3	783	76.6	138			3.7		260.975	42.0261	47.0543
1890	9.8	773	74	34			3.6		270.787	42.671	12.1846
1900	8.5	710	67.2	131			3.4		286.756	44.6764	54.1264
1910	8	689	64.4	130			3.3		295.667	45.4908	57.0703
1920	7.6	663	59.5	129			3.1		299.484	44.2416	59.6119
1930	7	629	53.7	125			2.9		308.48	43.3515	62.7147
1940	7	668	53.9	134			2.9		327.606	43.5129	67.2301
1950	6.6	650	56.8	1330			2.7		338.098	48.6331	707.725
1960	6.3	627	58.4	159			2.5		341.665	52.3841	88.6367
1970	5.9	608	62.1	322			2.4		353.774	59.4795	191.673
1980	5.1	623	52.7	408			2.1		419.365	58.394	280.962
Tree 26-1
1740	18.7	829	145	262			4.9		152.19	43.8181	49.2058
1750	19.3	739	127.3	242			4.6		131.45	37.2734	44.0367
1760	16.7	628	130	259			4.5		129.097	43.99	54.4679
1770	16.9	696	125	268			4.5		141.383	41.7976	55.6936
1780	15.8	642	121.2	262			4.4		139.493	43.3484	58.2373
1790	16	713	120	278			4.5		152.983	42.3827	61.0214
1800	16	689	114.1	263			4.5		147.834	40.2989	57.7288
1810	14	676	106.6	263			4		165.765	43.0285	65.9758
1820	14.2	799	108	254			4.1		193.167	42.9797	62.8206
1830	14.4	736	101	239			4.1		175.464	39.6357	58.2898
1840	13.6	730	94.2	233			4		184.271	39.1417	60.1692
1850	12.7	701	91.2	234			3.8		189.491	40.5806	64.7097
1860	16.9	749	92	228			4.3		152.149	30.763	47.3811
1870	13.7	716	83.6	229			4.1		179.418	34.4837	58.7046
1880	13.5	732	82	239			4		186.145	34.3248	62.1758
1890	13.2	710	78	232			4		184.654	33.3924	61.7264
1900	14.2	828	81.8	235			4		200.178	32.5531	58.1215
1910	15.5	750	82.1	208			4		166.113	29.9322	47.129
1920	14.9	683	76.5	211			3.8		157.365	29.0137	49.734
1930	14	607	82.2	174			3.7		148.845	33.1796	43.6494
1940	14.2	603	88.2	161			3.7		145.782	35.1001	39.8194
1950	14	797	85	184			4		195.436	34.3098	46.158
1960	13.8	680	81	249			4.1		169.162	33.1691	63.3691
1970	13.4	523	81.5	383			4.1		133.989	34.3701	100.381
1980	13.5	478	80.4	391			4.2		121.554	33.655	101.719
1990	12.7	461	86.1	466			4.3		124.615	38.3113	128.866
bark	141.2	11531	254.9	681			35.7		280.354	10.2015	16.9383
Tree 26-2
1840	15.3	820	88.1	225			3.9		183.991	32.5396	51.6474
1850	15.6	811	89.4	203			4		178.472	32.3847	45.7013
1860	15.1	786	88.8	21			3.9		178.698	33.2325	4.88427
1870	14.3	745	89.2	205			3.7		178.852	35.2498	50.3471
1880	13.8	712	86.1	194			3.6		177.123	35.2575	49.3719
1890	13.2	700	85	192			3.4		182.053	36.3892	51.0839
1900	12.9	718	85	189			3.5		191.077	37.2355	51.4552
1910	12.2	704	81	180			3.4		198.101	37.5191	51.8167
1920	11.5	658	75.4	163			3.3		196.427	37.0511	49.7791
1930	12	698	79	203			3.5		199.686	37.2026	59.4117
1940	11.7	772	75.7	193			3.2		226.519	36.5626	57.9333
1950	12.7	732	76.3	184			3		197.871	33.9507	50.8828
1960	11.1	754	79.9	196			2.7		233.197	40.6772	62.0141
1970	8.2	702	73.2	216			2.4		293.898	50.4458	92.5118
1980	8.1	681	61	333			2.6		288.626	42.5571	144.383
1990	9.1	608	61.1	508			2.5		229.37	37.9426	196.056
bark	139.6	14664	296.2	818			31		360.613	11.9902	20.579
Tree 26-3
1750	21.6	1014	124.9	334			8.1		161.16	32.6766	54.3062
1760-1770	20.5	975	120.6	319			7.7		163.277	33.2446	54.6505
1780-1790	20.9	1009	122.3	323			8		165.737	33.068	54.2767
1800-1810	20.4	977	119.9	306			7.8		164.414	33.2136	52.6803
1820	19.1	929	113.4	296			7.4		166.977	33.5511	54.4271
1830	15.5	803	106.6	291			6.1		177.852	38.8645	65.9354
1840	15.7	820	104.8	279			6.2		179.303	37.7215	62.4111
1850	14.7	788	102.1	261			5.8		184.027	39.2497	62.3563
1860	15.2	822	102.5	262			5.9		185.653	38.1073	60.5361
1870	15	825	103.8	261			5.9		188.815	39.1051	61.1092
1880	14.8	823	104	280			5.8		190.903	39.7099	66.4436
1890	15.3	840	110.6	298			5.7		188.478	40.8499	68.4041
1900	15.4	801	108.8	270			5.5		178.561	39.9242	61.5744
1910	15.3	804	109.1	254			5.4		180.401	40.2959	58.3041
1920	16.5	870	122.4	273			5.7		181.013	41.9204	58.108
1930	18.9	1011	127.4	254			6.2		183.638	38.0921	47.1986
1940	18.7	976	124.5	240			6.2		179.177	37.6232	45.0741
1950	16.4	988	128.7	256			5.8		206.817	44.3468	54.8218
1960	12.5	721	86.5	285			5.2		198.015	39.1051	80.0741
1970	10.4	673	65.6	324			4.7		222.155	35.645	109.413
1980	9.5	550	53.9	378			4.5		198.753	32.0622	139.741
1990	12	528	59.6	514			4.4		151.052	28.0668	150.432
bark		17785	436.8	1817			68.4
Sub-conopy
Sub-conopy
bark	251.1	19187	526.4				57		262.322	11.8467
inner wood	20.9	1035	105.5				5.6		170.007	28.5255
roots	67.7	1979	817.5				15.6		100.353	68.2381
Tree 10-3
current foiage	16.6	962	536				6.2		198.949	182.467
1 yr old foliage	33	3236	667				14.2		336.642	114.219
2 yr old foliage	30.3	3316	623				12		375.704	116.191
3 yr old foliage	30.2	5273	880				14.9		599.411	164.666
Tree 10-4
current foiage	12	776	508.8				4.7		222.001	239.604
1 yr old foliage	27.6	2106	834.7				13.7		261.953	170.903
2 yr old foliage	26.1	3138	723.4				12.5		412.749	156.627
inner wood	13.1	811	140.6				5.6		212.532	60.6515
roots	20.5	683	455.2				10		114.378	125.48
Tree 10-5
current foiage	12.2	1329	492.7				3.9		373.972	228.218
1 yr old foliage	30	3112	828.7				11.9		356.117	156.1
roots	38.8	2795	468.3				14.1		247.3	68.2056
Vaganov, E. A., Grachev, A. M., Shishov, V. V., Panyushkina, I. P., Leavitt, S. W., Knorre, A. A., Chebykin, E. P., and Menyailo, O. V. (2013).Elemental composition of tree rings: A new perspective in biogeochemistry. InDoklady Biological Sciences, volume 453, pages 375–379.1000Springer.
Larix gmelinii Rupr. from the Taimyr Peninsula	11	708	223	306					220.96	114.562	97.698
Chiarenzelli, J., Aspler, L., Dunn, C., Cousens, B., Ozarko, D., and Powis, K. (2001). Multi-element and rare earth element composition oflichens, mosses, and vascular plants from the central barrenlands, Nunavut, Canada.Applied Geochemistry, 16(2):245–270.
Lichen
gabbro	10.81	1700							539.88
quartzite	48.1	1400							99.921
granodiorite	14.7	1200							280.245
dolostone	8.29	1800							745.404
slate	8.9	1400							540.022
arkosic sand	6.28	900							491.99
mafic volcanic	17.8	1700							327.871
									Ca/Ba	Mg/Ba	K/Ba
Average									555.304	124.308	541.032
s.d									2274.04	343.959	2818.12
N									165	155	140
2 S.E									354.067	55.2549	476.349

## Sheet: Table S.8
Sample	River	[Na]sil	[Mg]sil	[Ca]sil	[K]sil	∑+sil	[Mg]bio			[Ca]bio			[K]bio			∑+bio			R(sil+bio)/sil (eqs. 18 and 19)
							median	25th	75th	median	25th	75th	median	25th	75th	median	25th	75th	median	25th	75th
								percentile	percentile		percentile	percentile		percentile	percentile		percentile	percentile		percentile	percentile
Solimões tributaries
AM08_05	Amazonas	260	17.654	22.459	35.5567	375.783	56.1191	28.5769	114.162	254.653	115.385	515.785	269.581	106.711	566.502	976.2	474.759	1824.5	3.59778	2.26339	5.85519
AM08_13	Ucayali	222.234	21.09	27.32	39.5567	358.61	36.9373	17.0068	90.024	185.431	71.5784	419.552	169.933	67.0899	484.714	683.675	305.542	1609.19	2.90646	1.85202	5.48729
AM08_24	Maranon	316.051	12.717	16	28.5567	402.042	16.8591	2.42688	43.0009	65.9472	6.53413	212.216	71.3291	8.33555	208.812	286.32	45.7474	733.255	1.71216	1.11379	2.82383
AM08_34	Morona	75.7088	15.207	43.0464	20.8249	213.04	20.5942	9.83616	40.7888	92.0782	39.1402	187.258	95.6883	40.5593	219.135	333.101	172.439	674.221	2.56356	1.80942	4.16475
AM08_36	Pastaza	143.295	69.654	52.65	27.5567	415.459
AM08_38	Huallaga	970.007	29.376	42.445	31.5567	1145.21	8.26019	-85.2566	121.799	18.9229	-375.756	482.21	28.4554	-431.517	548.216	125.702	-1550.99	2041.94	1.10976	-0.354331	2.78303
AM08_40	Tigre
Madeira tributaries
AM07_05	Beni at Rurrenabaque	129.999	89.9199	52.836	24.3567	439.867	26.1308	-11.171	107.877	137.467	-47.3292	499.997	134.631	-36.4878	530.381	562.468	-189.511	1790.67	2.27872	0.569164	5.07093
AM07_09	Beni at Riberalta	124.823	55.2132	36.371	33.0719	341.063	61.3952	21.2927	169.293	271.515	81.452	820.659	288.117	82.1435	864.598	1046.17	373.671	2852.83	4.06737	2.09561	9.36453
AM07_14	Madre de dios	73.798	17.507	30.267	29.8227	199.169
AM07_15	Mamoré	107.633	68.7986	34.506	70.6239	384.866
AM01_08	Alto Beni	235.311	91.8032	68.8524	28.1567	584.779	24.3385	-0.447388	89.7826	133.845	-3.43943	459.763	110.453	-9.70453	450.108	541.044	-42.4385	1561.28	1.92521	0.927428	3.66987
AM1_10	Chepete
AM1_12	Quiquibey
AM1_17	Orthon	77.5559	26.7332	30.712	41.0167	233.463
"Dilute" tributaries
AM6/1-20	Tapajos	22.472	7.5264	6.58	22.075	72.7599	4.01424	2.35706	7.65495	19.04	8.2709	36.7849	20.5359	7.81928	40.1987	74.045	40.9803	126.691	2.01766	1.56323	2.74123
AM6/1-13	Trombetas	23.5528	3.564	3.08	17.1053	53.9461	12.0059	6.73127	23.0251	58.0089	29.4944	106.842	62.0424	31.5973	122.107	206.912	119.829	367.191	4.83552	3.22127	7.80664
AM06_20	Negro
Main tributaries
AM05_04	Solimões	27.9816	11.1712	21.7873	22.0059	115.904	21.5337	10.7605	44.3292	95.9813	47.9781	216.478	106.039	46.8039	247.889	350.003	202.54	787.185	4.01976	2.74748	7.79167
AM06_35	Madeira	38.8	16.212	15.792	30.9121	133.72	14.2481	7.28954	27.6757	61.6236	32.9179	121.593	69.087	32.8984	139.051	223.54	128.302	449.025	2.6717	1.95949	4.35795
AM06_63	Amazonas Obidos	32.6992	11.217	21.0136	19.2199	116.38	8.00708	3.83341	16.4001	31.6513	15.1042	72.3709	36.8551	15.7584	84.0441	123.357	67.8947	247.726	2.05995	1.58339	3.12859
Silicate-derived cationic loads Ssil (expressed in µmol/L) are from Dellinger, M., Gaillardet, J., Bouchez, J., Calmels, D., Louvat, P., Dosseto, A., Gorge, C., Alanoca, L., and Maurice, L. (2015b). Riverine Li isotope fractionation in the Amazon River basin controlled by the weathering regimes. Geochimica et Cosmochimica Acta, 164:71–93.
The difference which might exist between the sum of each individual cation biological storage (expressed in equivalent dissolved concentration, called [X]bio) and ∑+bio comes from the fact that during Monte Carlo simulation, ∑+bio values were discarded if one of the [X]bio values was negative.
