# Supplementary material for: Barium stable isotopes as a fingerprint of biological cycling in the Amazon River basin
Source: Copernicus journal article supplement (doi:10.5194/bg-17-5989-2020), 2020-12-03
Supplement: Supplementary file 2 [file bg-17-5989-2020-supplement.zip]

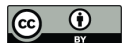

## *Supplement of*

# **Barium stable isotopes as a fingerprint of biological cycling in the Amazon River basin**

**Quentin Charbonnier et al.**

*Correspondence to:* Quentin Charbonnier ([quentin.charbonnier@erdw.ethz.ch](mailto:quentin.charbonnier@erdw.ethz.ch))

- [bg-17-5989-2020-supplement-title-page.pdf](#)
- [Supplementary\\_Charbonnier\\_et\\_al\\_BG\\_2020.pdf](#)
- [Supplementary\\_tables\\_Charbonnier\\_et\\_al\\_BG\\_2020.xlsx](#)

The copyright of individual parts of the supplement might differ from the CC BY 4.0 License.
